# Supplementary material for: Genome-wide association and Mendelian randomisation analysis provide insights into the pathogenesis of heart failure
Source: PubMed Central journal article supplement (PMC6952380; doi:10.1038/s41467-019-13690-5), 2020-01-09
Supplement: 41467_2019_13690_MOESM3_ESM.pdf [file 41467_2019_13690_MOESM3_ESM.pdf]

**Title:** Supplementary Data 1

**Description:** Previously reported loci for heart failure and dilated cardiomyopathy

**Title:** Supplementary Data 2

**Description:** Association of sentinel variants or proxies with diseases and traits in NHGRI-EBI GWAS catalog

**Title:** SupplementaryData 3

**Description:** Association of sentinel variants with diseases and traits in UK Biobank

**Title:** Supplementary Data 4

**Description:** Genome-wide significant associations of sentinel variants or proxies with heart failure related traits

**Title:** Supplementary Data 5

**Description:** Associations of sentinel variants with heart failure after conditioning on risk factor traits using mtCOJO

**Title:** Supplementary Data 6

**Description:** MAGMA gene-based association analysis

**Title:** Supplementary Data 7

**Description:** Sentinel variants or proxies with missense protein coding consequence

**Title:** Supplementary Data 8

**Description:** Significant eQTL associations for sentinel HF variants in heart tissue

**Title:** Supplementary Data 9

**Description:** Significant protein quantitative trait locus (pQTL) associations for sentinel HF variants in whole blood

**Title:** Supplementary Data 10

**Description:** Mendelian randomisation analysis of the effect of risk factor traits on HF risk

**Title:** Supplementary Data 11

**Description:** Participating study definitions for heart failure

**Title:** Supplementary Data 12

**Description:** Characteristics of participating studies

**Title:** Supplementary Data 13

**Description:** Summary of genotyping, QC, imputation and analysis per study
